# Supplementary material
Source: publisher site journal article supplement (https://www.spandidos-publications.com/908/downloadSupplementary)
Supplement: Supplementary file 1 [file downloadSupplementary]

## Sheet: Sheet1
	Table SII: Percentage of cells with copy number 3,4 and ≥5. Concordance of telomeric probe and centromeric probe copy number, within intraobserver error, highlighted. Green shading concordance, suggesting whole chromosome or large segment duplication, red shading discordant but aneuploid for both probes. Only informative results highlighted.
			A 1			A 2			A 3			A 4			A 5			A 6			A 7			A 8			A 9			A 10			A 11			A12
			3n	4n	≥5n	3n	4n	≥5n	3n	4n	≥5n	3n	4n	≥5n	3n	4n	≥5n	3n	4n	≥5n	3n	4n	≥5n	3n	4n	≥5n	3n	4n	≥5n	3n	4n	≥5n	3n	4n	≥5n	3n	4n	≥5n
	CHROM 3	Centromeric 3	31.5	8.5	5.5	8	0.5	0.5	4.5	0.5	nil	8	1	0.5	30.2	19.598	7.53769	31.5	6	nil	28.5	7	1	13.5	27	53.5	12.5	3	nil	16	4	1.5	21.3	3.82514	0.5	22	5.5	2
		TP63 (3q28)	32	7.5	3	7	0.5	nil	6	nil	nil	12.5	3	0.5	33.5	12.5	5.5	22	3.5	0.5	25	6	1	23	29.5	32.5	7.5	2.5	nil	34.5	16.5	8.5	13.6612	2.2	0.5	28	22.5	41.5
	CHROM 7	Centromeric 7	21	6	1	9.5	1	nil	21	0.5	nil	24.5	3.5	nil	29.5	5	nil	18	5.5	nil	31	7	1.5	25.5	23.5	20	28.5	8	1.5	15.5	1	nil	19.5	4.5	1	8	1.5	0.5
		EGFR (7p11.2)	22.5	8.5	1	6	nil	nil	17	0.5	nil	20	3.5	nil	32.5	5	nil	20	5	nil	26	7	1.5	14.5	5	3	6	nil	nil	22	nil	1	14	4	0.5	0.5	0.5	0.5 (71.5% showed cluster)
	CHROM 8	Centromeric 8	32	10	5.5	6.5	nil	nil	15	nil	0.5	13	4	nil	17	3.5	1	34	18.5	8.5	37.5	27	8	26	17.5	8.5	10	nil	nil	28.5	14.5	6.5	14	2.5	0.5	30.5	34	14.5
		PTK2 (8q24.3)	20	11.5	2.5	8.5	1	nil	15	nil	0.5	14	4.5	2.5	27	14	4	20	5	4	28.5	11	2	12	21	58	10	1.5	1.5	23.5	6.5	2.5	13	4.5	2	32	24	12.5
	CHROM 11	Centromeric 11	27.5	1.5	0.5	9.5	1	nil	5.5	1	nil	12.5	5.5	0.5	14.5	2	1	27.5	5	1	23	7.5	1	32	21	13	17	7.7	3.3	9.5	3	1	9.5	2	nil	33	19	3
		CCND1 (11q13.3)	23.5	7	2.5	10	2	nil	7.5	nil	nil	15.5	5.5	nil	27	15	10.0 (12% showed cluster)	27	5.5	4.5	33.5	20.5	10	26.5	9	1	3.3	6.1	21.0 (42.5% showed cluster)	1.1	2.2	5.9 (80.5% showed cluster)	17	4	nil	1.5	2.5	8.5 (70.5% showed cluster)
	CHROM 20	Telomeric 20p	26.5	12	3	12.5	0.5	nil	2.5	1	nil	19	11	0.5	29.5	9	1.5	27	7.5	3	29.5	27	14.5	30	12	1	28	20	13.5	18	7	5	20	4.5	nil	35.5	21	2
		MMP9 (20q13.12)	33.5	12.5	1.5	5	1	nil	1.5	0.5	nil	21	9.5	nil	36.5	12.5	0.5	28.5	8	1.5	26	20.5	4	26	7	1	16	2	0.5	13	0.5	0.5	13.5	4	nil	35.5	12	1
